# Supplementary material for: Nitrogen- and oxygen-containing activated carbons from sucrose for electrochemical supercapacitor applications
Source: Royal Society of Chemistry journal article supplement (doi:10.1039/c5ra06661a), 2015-01-01
Supplement: c5ra06661a1.pdf [file c5ra06661a1.pdf]

## **Supplementary Information**

### **Nitrogen- and oxygen-containing activated carbons from sucrose for electrochemical supercapacitor application**

Navaladian Subramanian and Balasubramanian Viswanathan\*

National Center for Catalysis Research (NCCR),  
Indian Institute of Technology Madras,  
Chennai 600 036, India.

E-mail: [bvnathan@iitm.ac.in](mailto:bvnathan@iitm.ac.in)

Tel: +91 44 2257 4241

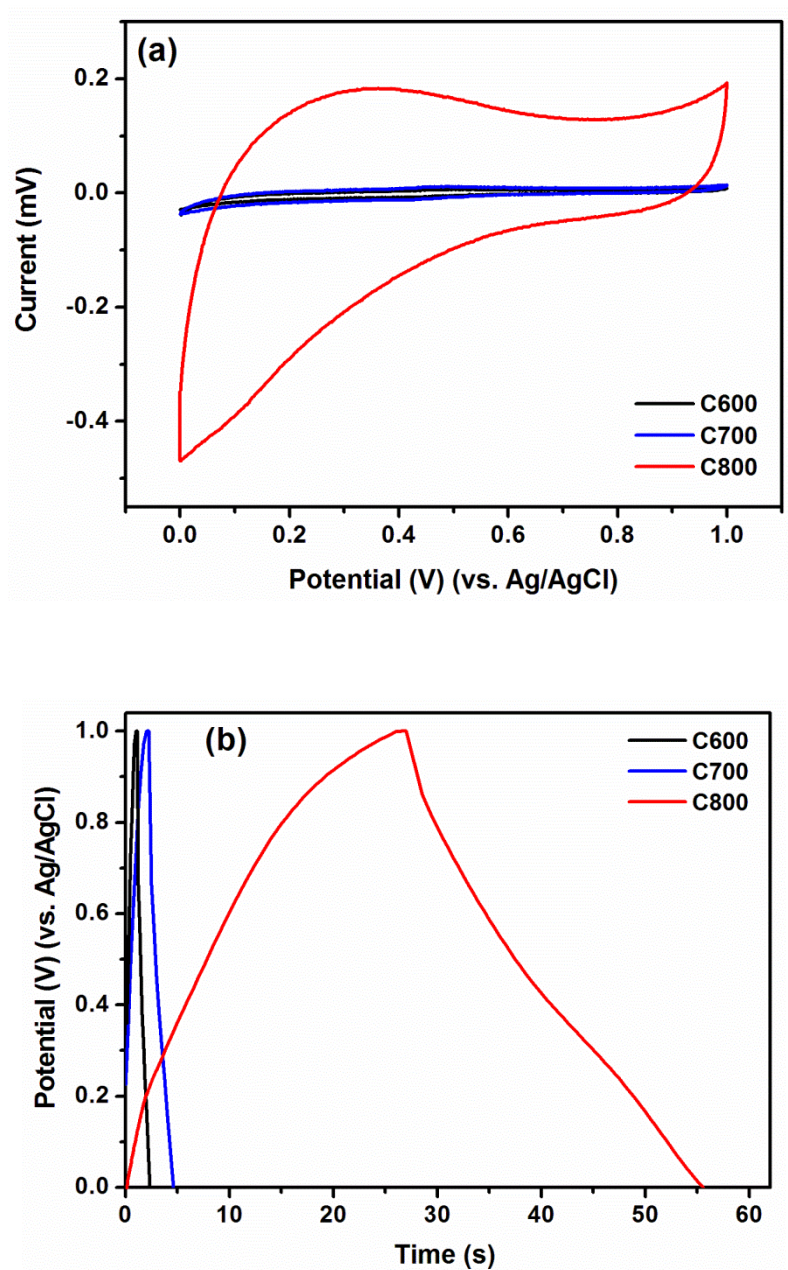

**Fig. S1** (a) Cyclic voltammograms of C600, C700 and C800 carbons, recorded in 1 M  $\text{H}_2\text{SO}_4$  at the scan rate of  $10 \text{ mV s}^{-1}$  and (b) galvanostatic charge-discharge curves (b) collected with a current of  $0.5 \text{ mA}$ .

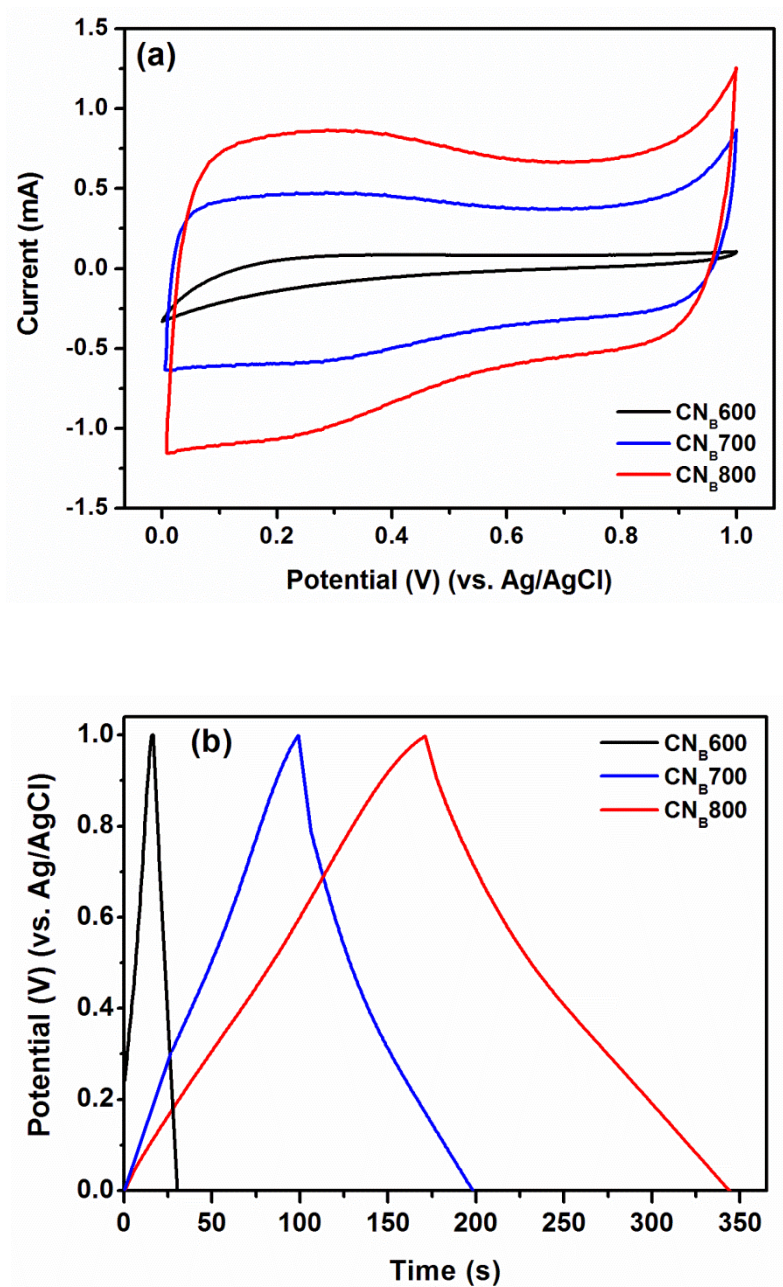

**Fig. S2** (a) Cyclic voltammograms of CN<sub>B</sub> 600, CN<sub>B</sub> 700 and CN<sub>B</sub> 800 carbons, recorded in 1 M H<sub>2</sub>SO<sub>4</sub> at the scan rate of 10 mV s<sup>-1</sup> and (b) galvanostatic charge-discharge curves collected with a current of 0.5 mA.
